# Supplementary material
Source: Springer Nature journal article supplement (https://www.springermedizin.de/resource/supplementary/13058_2011_2861_MOESM15_ESM.pdf/9702742)

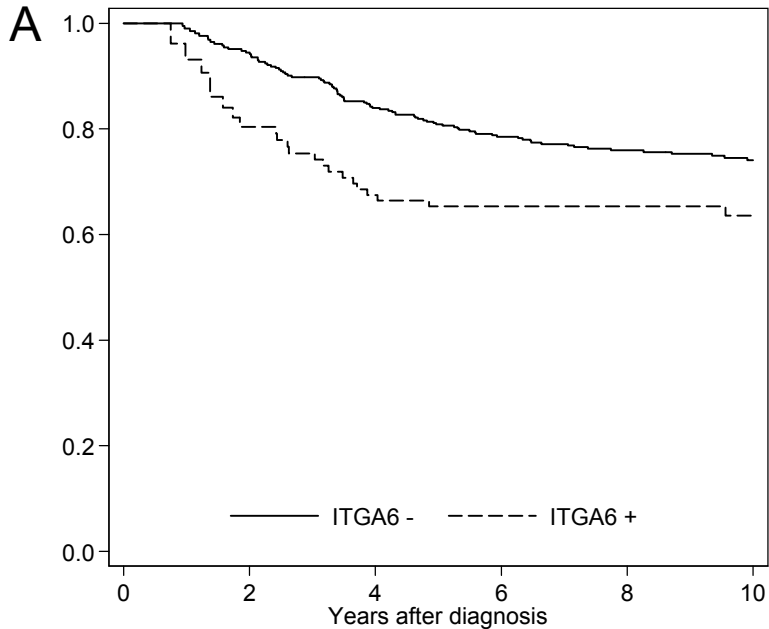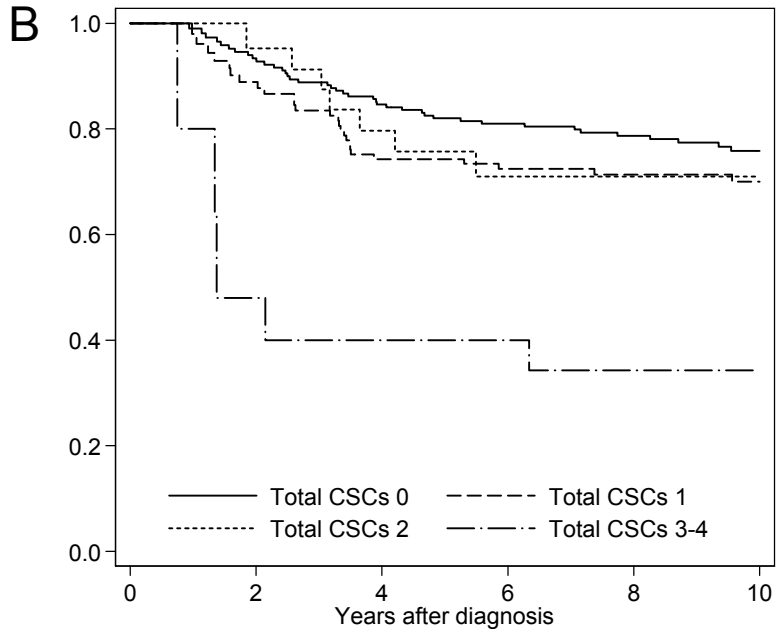

Supplement: MOESM15 [file 9702742]
